# Supplementary material for: Force-dependent allostery of the α-catenin actin-binding domain controls adherens junction dynamics and functions
Source: PubMed Central journal article supplement (PMC6269467; doi:10.1038/s41467-018-07481-7), 2018-11-30
Supplement: 41467_2018_7481_MOESM1_ESM.pdf [file 41467_2018_7481_MOESM1_ESM.pdf]

**Force-dependent allostery of the  $\alpha$ -catenin actin-binding domain controls adherens junction dynamics and functions**

Ishiyama et al.

**Supplementary Information**

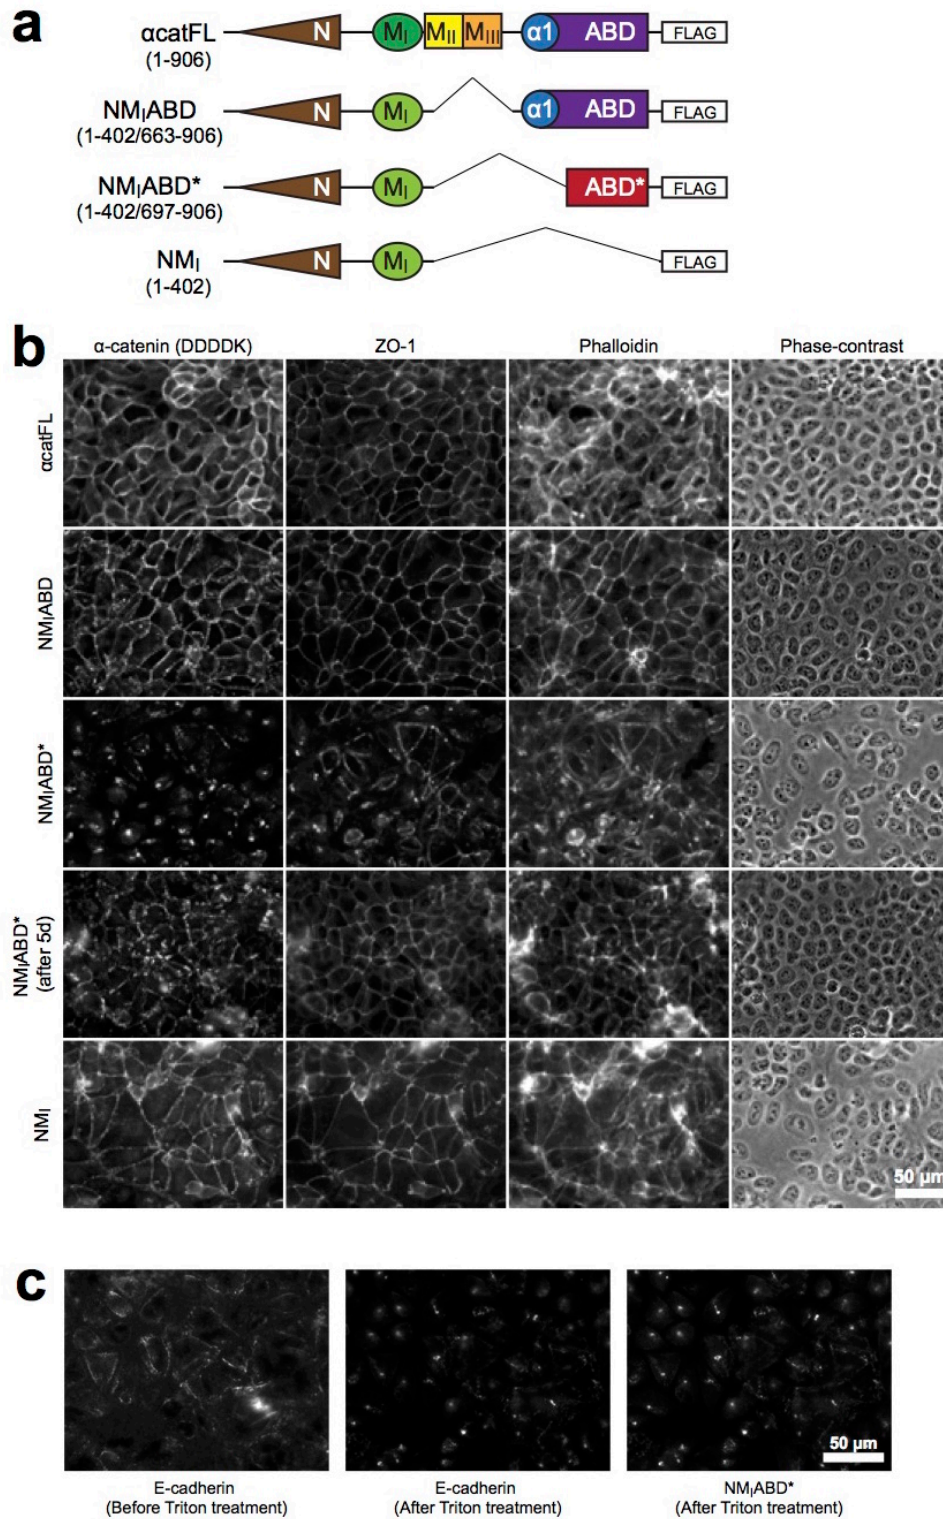

**Supplementary Figure 1: Cadherin-catenin complexes trapped intracellularly with F-actin during cell-cell junction remodelling.**

**a.** Schematic diagrams of  $\alpha$ E-catenin variants.  $\alpha$ catFL: full-length  $\alpha$ E-catenin (residues 1-906). N: N-terminal dimerization domain (residues 1-262). M<sub>I</sub>: M<sub>I</sub> region (residues 290-395) contains

a cryptic vinculin-binding site (VBS; residues 305-352) that becomes constitutively active when the autoinhibitory M<sub>II-III</sub> regions are absent. ABD: actin-binding domain (residues 663-906).  $\alpha$ 1: the  $\alpha$ 1-helix (residues 669-675) of ABD. ABD\*: an N-terminally truncated ABD (residues 697-906), which is missing  $\alpha$ 1-helix and a part of  $\alpha$ 2-helix. All  $\alpha$ -catenin constructs contain a C-terminal FLAG tag.

**b.** R2/7 cells stably expressing  $\alpha$ -catenin variants were trypsinized, replated at 30% confluency and imaged after 2d (additional images were taken after 5d for NM<sub>I</sub>ABD\*). Since full-length  $\alpha$ -catenin can interact with F-actin both directly and indirectly (e.g., via vinculin) in a force-dependent manner, we selectively minimized the force-dependency of indirect F-actin binding by deleting the autoinhibitory M<sub>II-III</sub> regions of  $\alpha$ -catenin to constitutively activate the M<sub>I</sub>/VBS region. Cells expressing various  $\alpha$ -catenin mutants ( $\alpha$ catFL, NM<sub>I</sub>ABD, NM<sub>I</sub>ABD\* and NM<sub>I</sub>) were compared to examine the effects of ABD deletions on the direct  $\alpha$ -catenin-F-actin interaction during cell-cell junction remodelling. Whereas cells expressing NM<sub>I</sub>ABD or NM<sub>I</sub> formed AJs at a similar pace as cells expressing  $\alpha$ catFL (2 d), cells expressing NM<sub>I</sub>ABD\* showed cadherin-catenin complexes trapped intracellularly with F-actin (2d) and required additional time to establish tight junction network stained with ZO-1 antibody (5d).

**c.** Cadherin-catenin clusters found in R2/7 cells expressing NM<sub>I</sub>ABD\* (as shown in b) distribute intracellularly 2 days after replating. Before triton treatment, ECCD2 that recognizes the extracellular domain of E-cadherin was applied and it stained E-cadherin expressed only on cell surface (left). After triton treatment, clone36/E-cadherin that recognizes the cytoplasmic domain of E-cadherin stained clusters in the cytoplasm (middle), suggesting that these structures are likely isolated in the cytoplasm. NM<sub>I</sub>ABD\* colocalizes with the E-cadherin cluster (right).

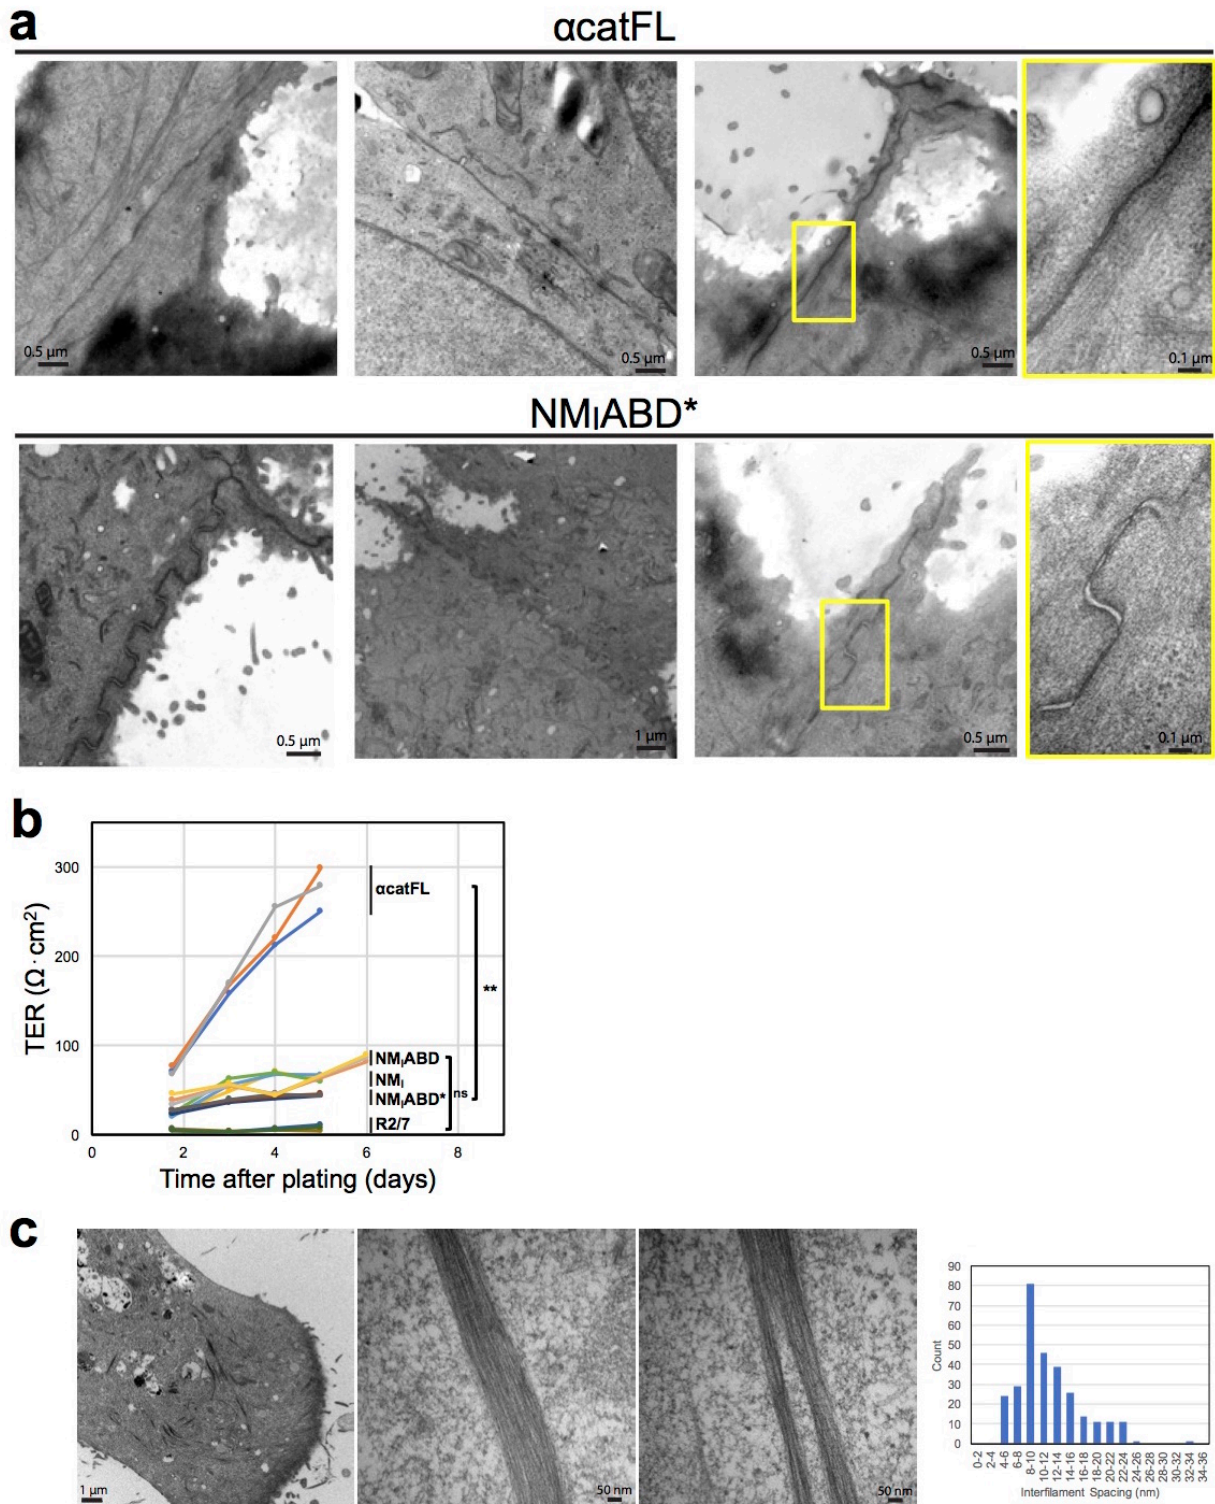

**Supplementary Figure 2:** An N-terminal truncation of the  $\alpha$ -catenin ABD contributes to square-wave-like intercellular junctions and the actin rod formation.

**a.** Electron micrographs of cell-cell junctions formed by R2/7 cells expressing  $\alpha$ catFL or NM<sub>I</sub>ABD\*. While  $\alpha$ catFL-expressing cells formed continuous linear cell junctions, NM<sub>I</sub>ABD\*-expressing cells formed intercellular junctions in a square-wave pattern.

**b.** Transepithelial electric resistance (TER) measurements of R2/7 cells expressing  $\alpha$ E-catenin variants over 5 days. Compared with  $\alpha$ EcatFL, cells expressing other  $\alpha$ E-catenin variants displayed lower TER, indicating aberrant tight junction formation and/or function. Significance by ANOVA. N=3.

**c.** Electron micrographs of actin rods formed in R2/7 cells expressing ABD\* (left). These actin rods consist of tightly packed F-actin bundles (middle) with the average inter-filament spacing of 7-8 nm (right).

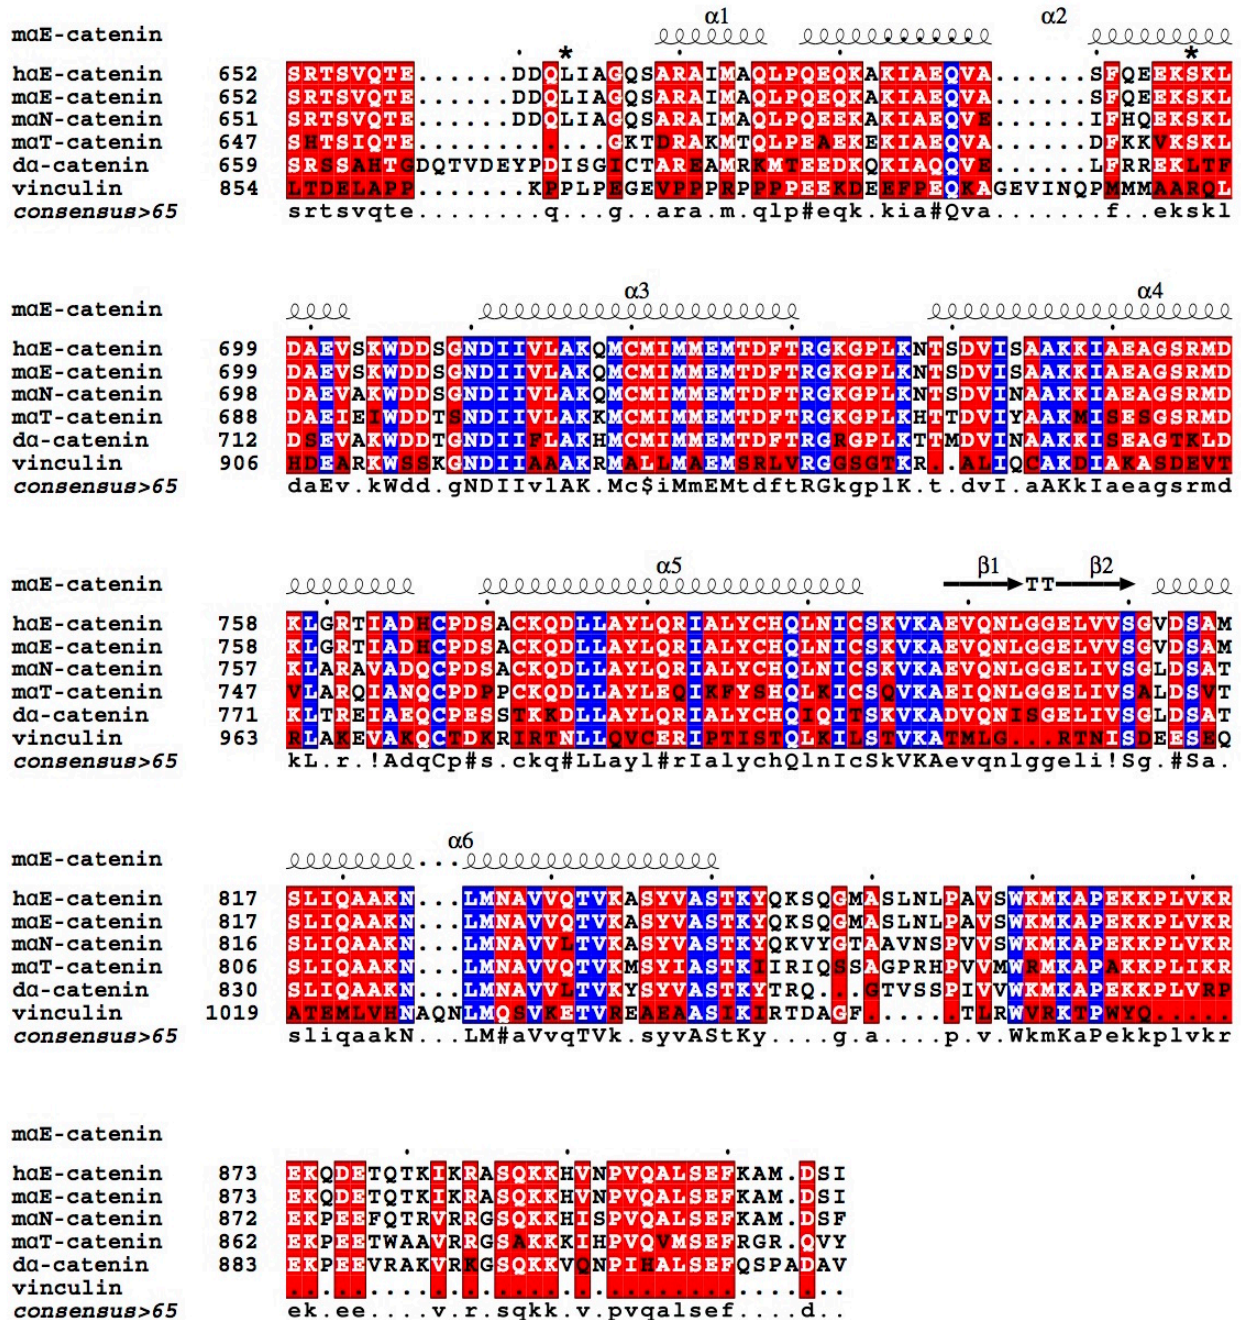

**Supplementary Figure 3:** Multiple sequence alignment of the  $\alpha$ -catenin/vinculin ABDs.

Multiple sequence alignment of human  $\alpha$ E-catenin, mouse  $\alpha$ E-catenin, mouse  $\alpha$ N-catenin, mouse  $\alpha$ T-catenin, *Drosophila*  $\alpha$ -catenin, and human vinculin. The secondary structure elements shown are from the crystal structure of  $\alpha$ Ncat-ABD-WT (PDB ID: 4K1O). Asterisks (\*) mark the  $\alpha$ E-catenin residues 663 and 696. Blue box: strictly conserved residues. Red box: highly conserved residues.

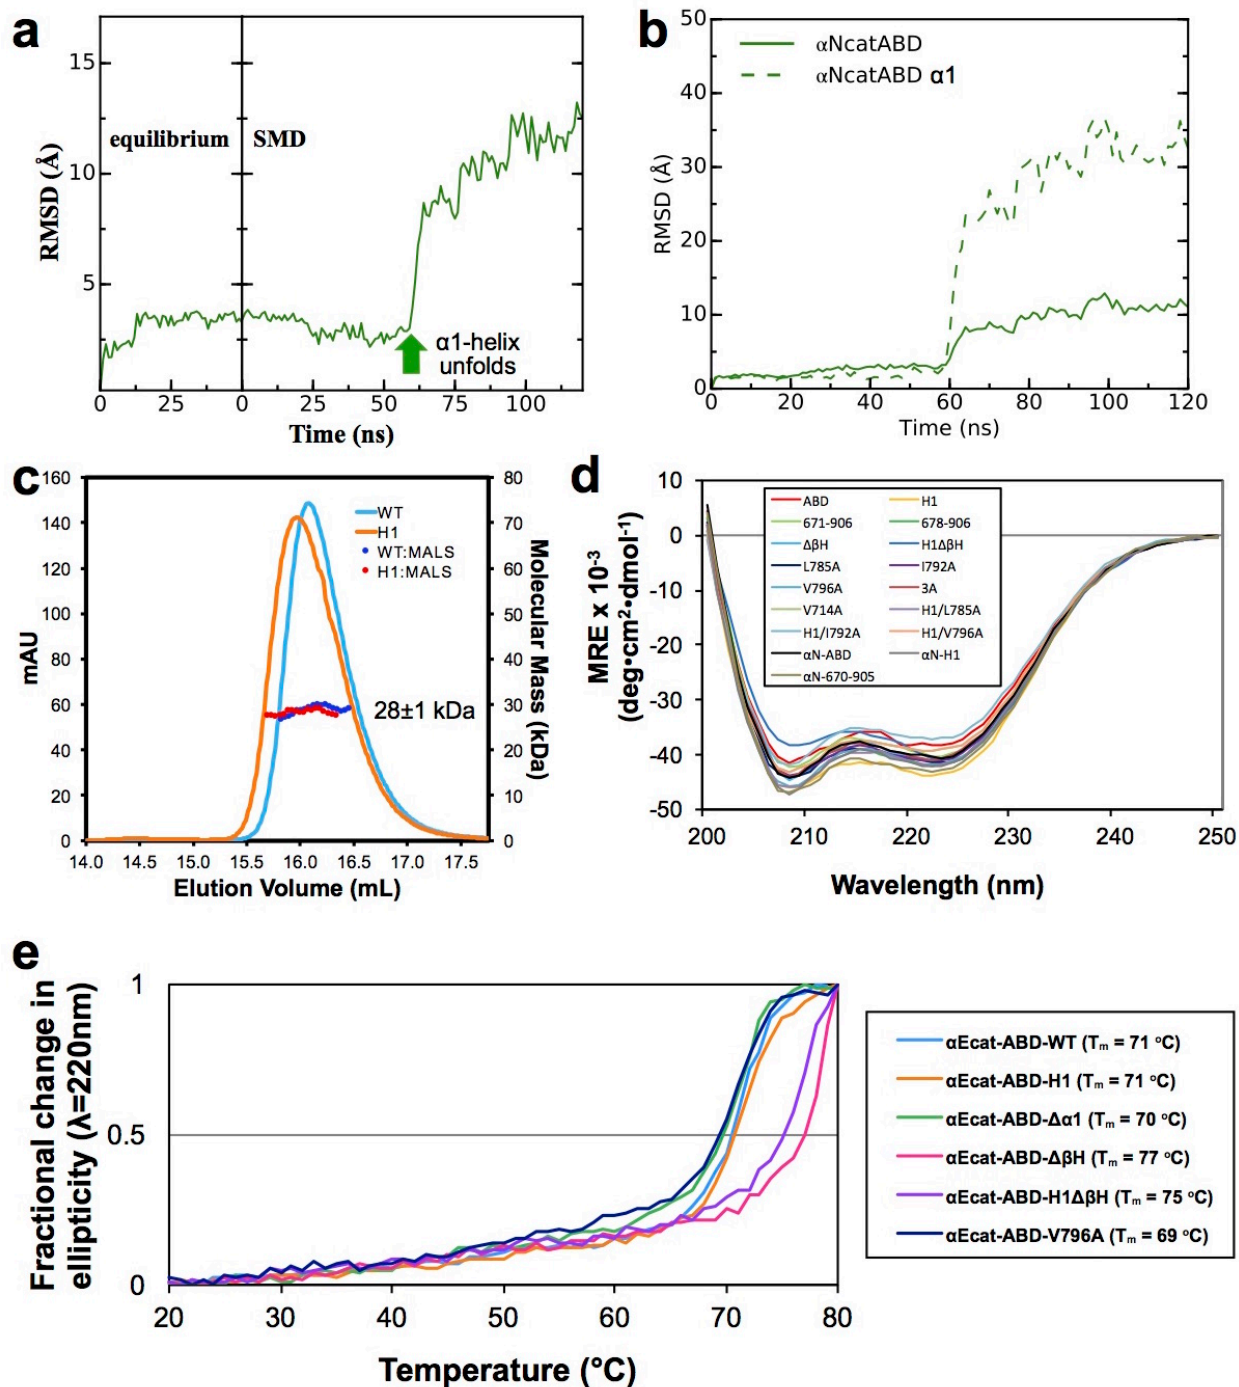

**Supplementary Figure 4: Structural stability of the  $\alpha$ -catenin ABD.**

**a.** Root-mean-square deviation (RMSD) from the crystal structure of the  $\alpha$ Ncat-ABD-WT during 50-ns equilibrium molecular dynamics (MD) and subsequent 120-ns constant-force SMD simulations. A sudden increase in the RMSD value coincides with the unfolding of  $\alpha$ 1-helix at 60 ns (green arrow).

**b.** Plots of RMSD from the equilibrated ABD structure (the initial state of the constant-force SMD simulation in **a**) for the entire ABD (green solid line) and the  $\alpha$ 1-helix (green dashed line) during the constant-force SMD simulation of  $\alpha$ Ncat-ABD-WT.

- c.** SEC-MALS profiles of  $\alpha$ Ecat-ABD-WT and  $\alpha$ Ecat-ABD-H1 obtained with the 5 mg/mL protein samples. The MALS-based estimation of the molecular masses of WT and H1 ( $28\pm 1$  kDa) are consistent with the theoretical mass of the  $\alpha$ Ecat-ABD-WT monomer (28,522 Da).
- d.** CD spectra of  $\alpha$ Ecat- and  $\alpha$ Ncat-ABD variants. Samples are  $\alpha$ Ecat-ABDs, except for three  $\alpha$ Ncat-ABDs denoted by “ $\alpha$ N-” label.
- e.** Thermal unfolding plots of  $\alpha$ Ecat-ABD variants monitored by far-UV CD changes at 220 nm. The melting temperature ( $T_m$ ) of  $\alpha$ Ecat-ABD was not affected by various mutations, including H1,  $\Delta\beta$ H and V796A.



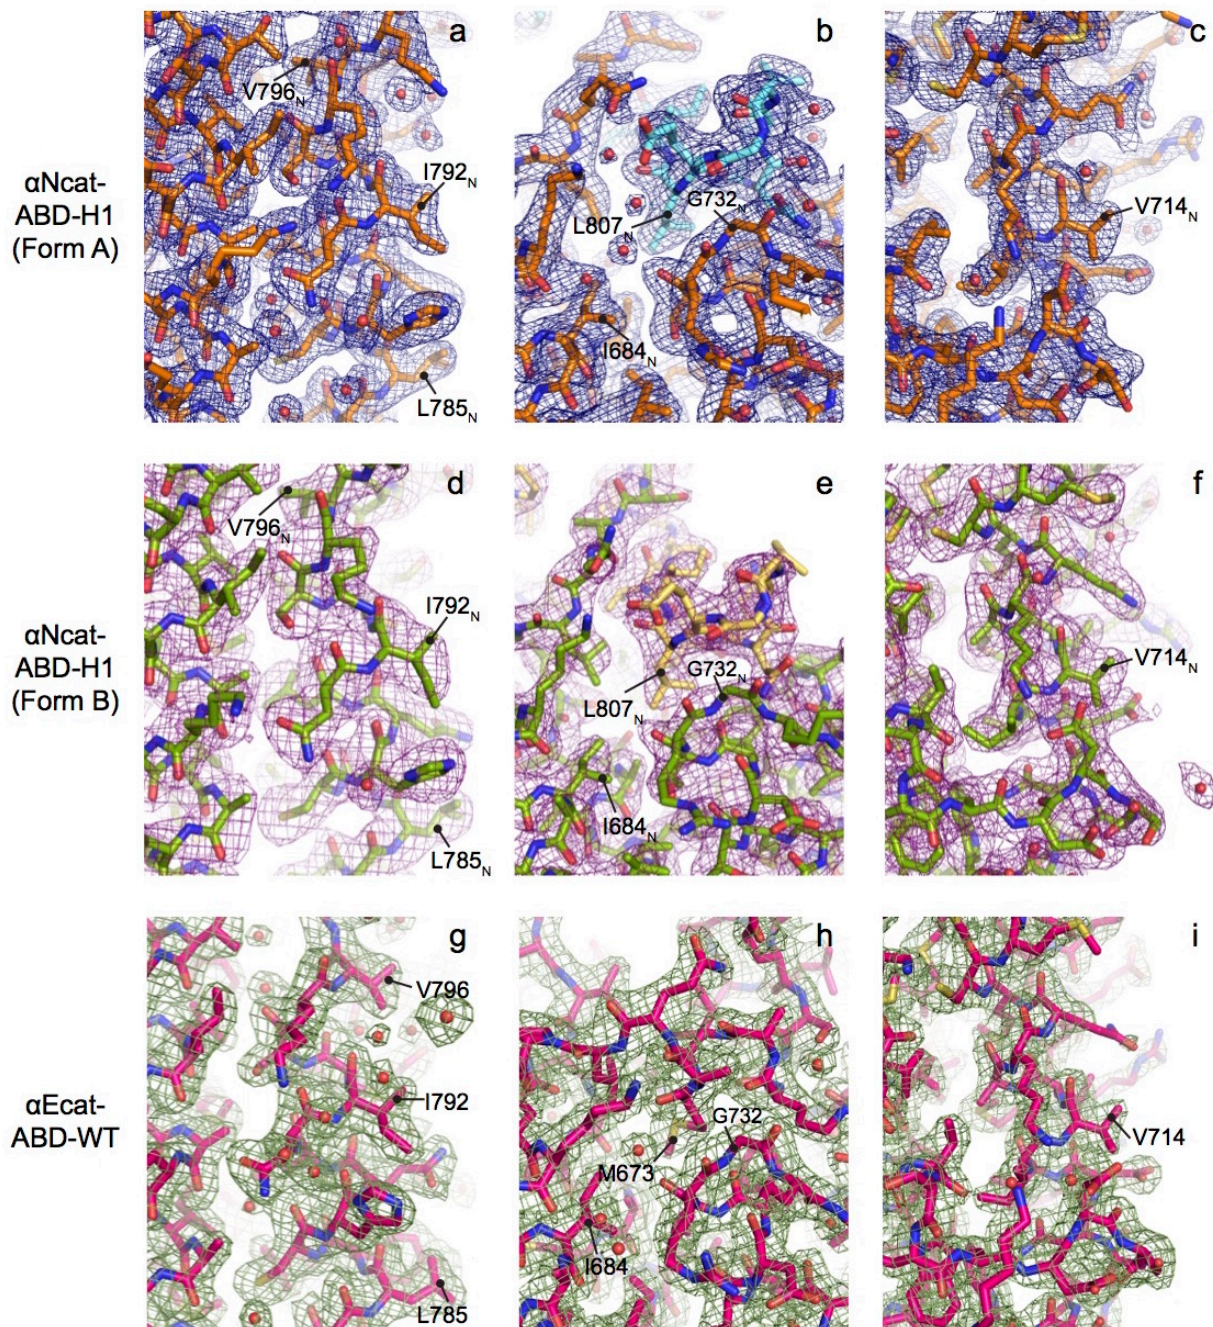

**Supplementary Figure 5:** Electron density maps of  $\alpha$ cat-ABD crystal structures. **Top:** The 2mFo-DFc map ( $1\sigma$ ) of the  $\alpha$ Ncat-ABD-H1 form A crystal structure around the actin-binding site (a),  $\beta$ H-dimer interface (b) and V714 (c). **Middle:** The 2mFo-DFc map ( $1\sigma$ ) of the  $\alpha$ Ncat-ABD-H1 form B crystal structure in similar views as top panels are shown as d, e and f. **Bottom:** The 2mFo-DFc map ( $1\sigma$ ) of the  $\alpha$ Ecat-ABD-WT crystal structure in similar views as top panels are shown as g, h and i.

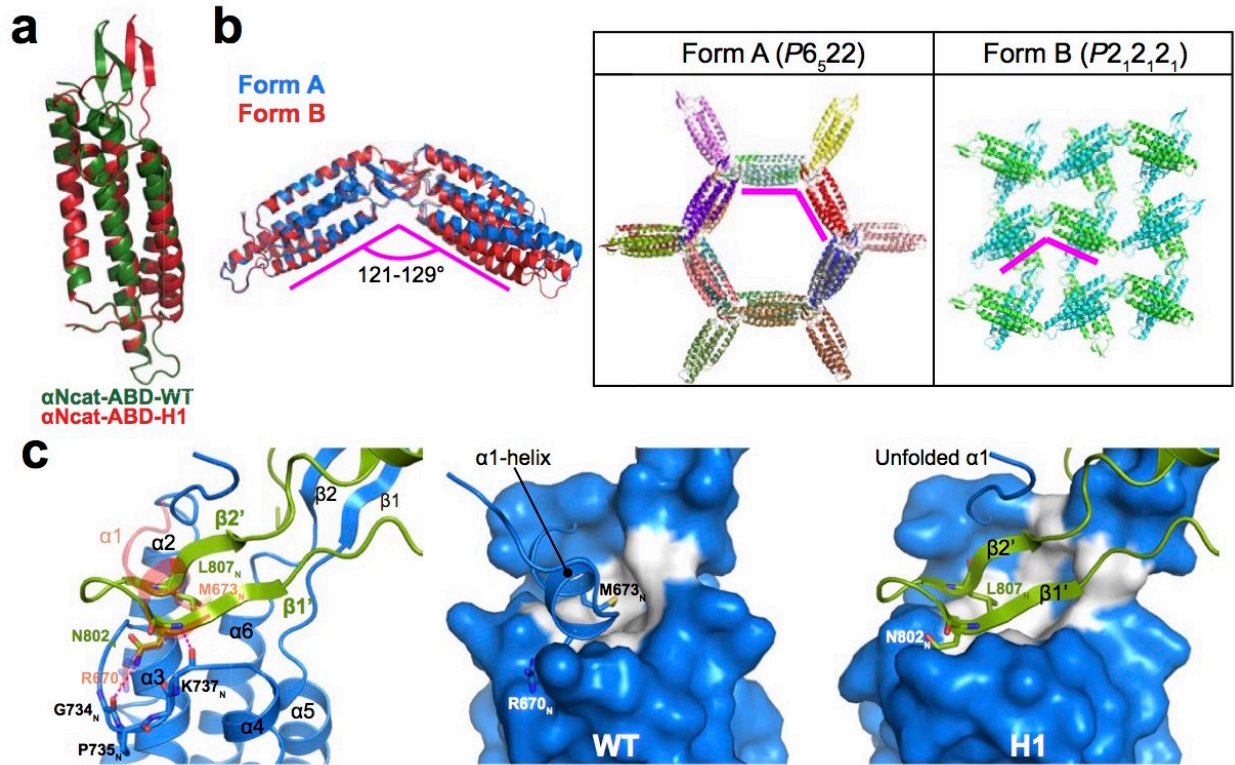

**Supplementary Figure 6:** Structural studies of the  $\alpha$ cat-ABD dimer interface.

**a.** Superposition of  $\alpha$ Ncat-ABD-WT and  $\alpha$ Ncat-ABD-H1 crystal structures. All crystallographically unique structures of  $\alpha$ Ncat-ABD-H1 from two different crystal forms closely resemble the  $\alpha$ Ncat-ABD-WT structure (PDB ID: 4K1O): the RMSD of C $\alpha$  atoms of 148 out 186 residues is  $<0.36$  Å, except for the  $\alpha$ N-catenin residues 669<sub>N</sub>-675<sub>N</sub> adopting an extended conformation instead of an  $\alpha$ -helix due to the H1 mutation and the  $\beta$ H motif (residues 799<sub>N</sub>-810<sub>N</sub>).

**b.** Overlay of  $\alpha$ Ncat-ABD-H1 homodimer structures from crystal forms A and B. The asymmetrical unit of form A contains one molecule, thus the homodimer consists of two crystallographically related molecules, whereas in form B two  $\alpha$ Ncat-ABD-H1 molecules found in the asymmetric unit constitute the homodimer. Symmetry molecules of  $\alpha$ Ncat-ABD-H1 in two different crystal forms are shown (right). The intermolecular angle of the ABD dimer ranges from 121 to 129°.

**c.** The ABD dimer interface involves a hydrophobic patch exposed by  $\alpha$ 1-helix unfolding. The left panel shows a slightly rotated view of Fig. 2b. A surface rendition of the  $\alpha$ Ncat-ABD-WT residues 677<sub>N</sub>-906<sub>N</sub> with the  $\alpha$ 1-helix in cartoon (middle) helps to identify a hydrophobic patch (white) beneath the  $\alpha$ 1-helix. At the dimer interface, the  $\beta$ H of each protomer interacts with the hydrophobic patch on the opposite protomer in a reciprocal manner (right). Interestingly, the  $\beta$ H residue L807<sub>N</sub> mimics a key hydrophobic interaction between M673<sub>N</sub> of  $\alpha$ 1-helix and the hydrophobic patch in the  $\alpha$ Ncat-ABD-WT structure (left).

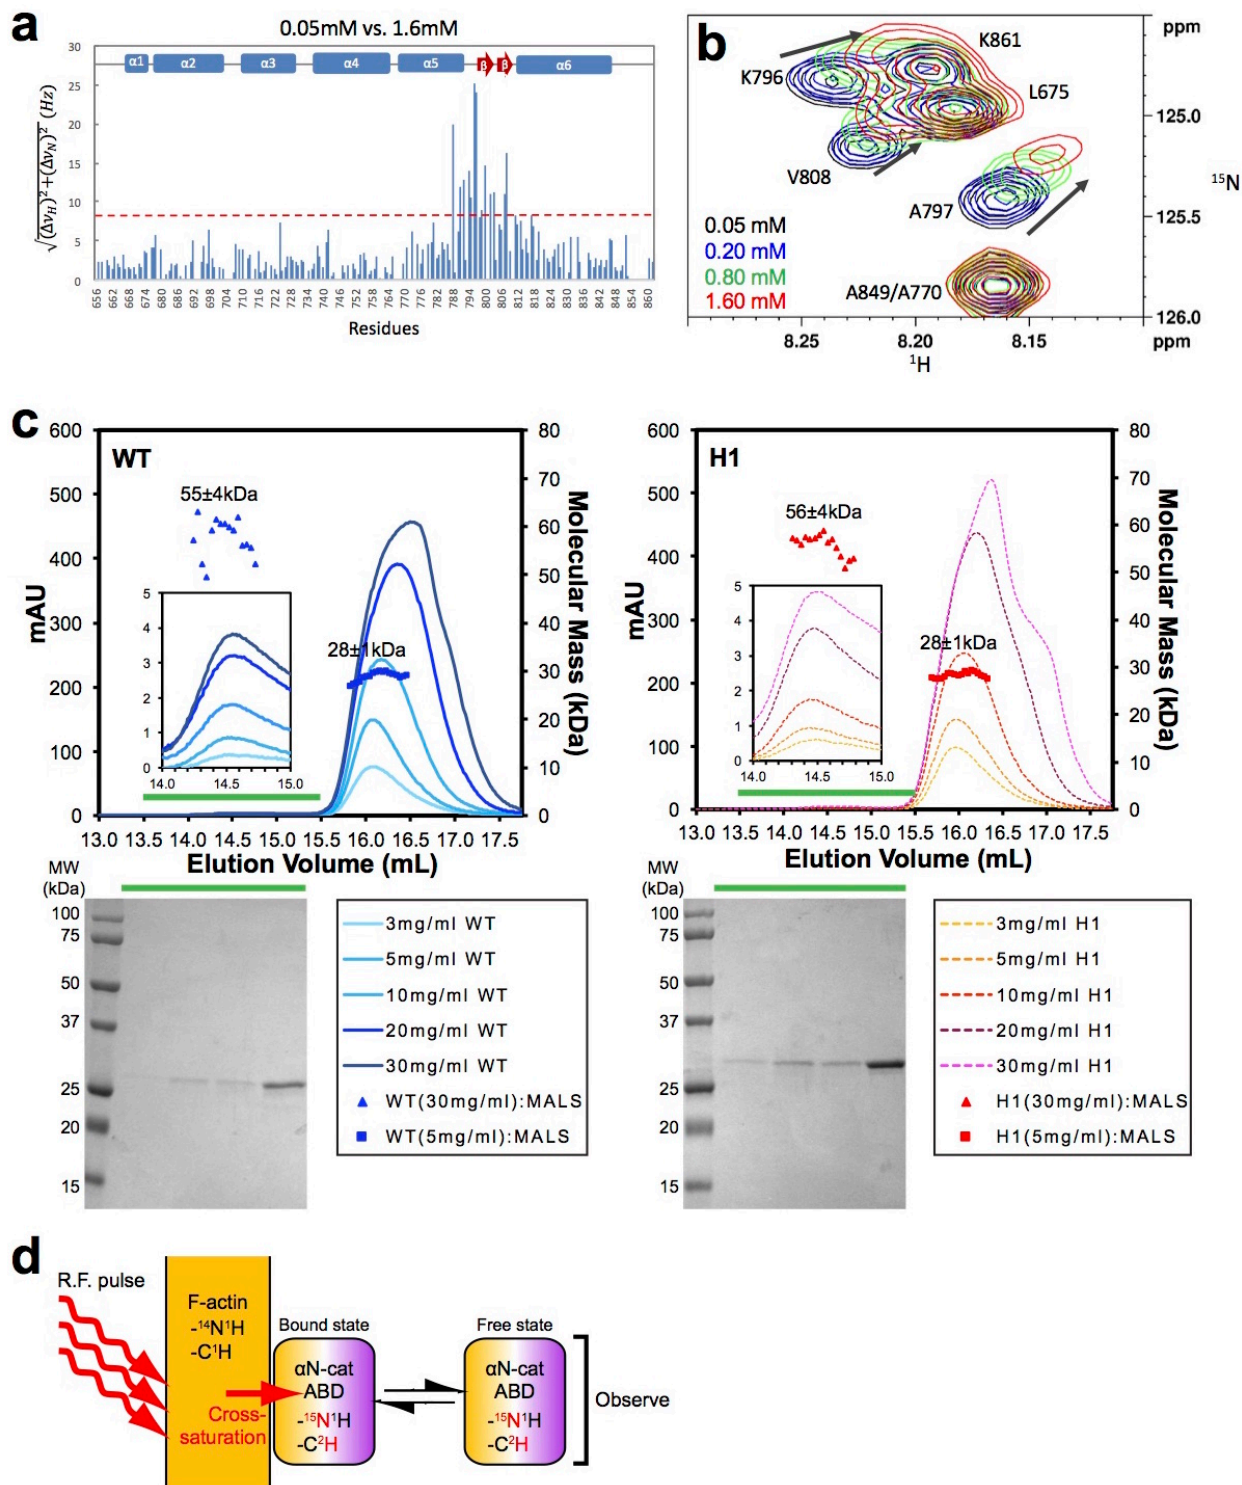

**Supplementary Figure 7: Weak homodimerization of  $\alpha\text{cat-ABD}$ .**

**a.** Plots of chemical shift perturbations (CSPs) of  $\alpha\text{Ncat-ABD-H1}$  at two different sample concentrations (0.05 mM and 1.6 mM) show that concentration-dependent perturbations mostly occurred in the  $\beta\text{H}$  motif.

- b.** An overlay of  $^1\text{H}$ - $^{15}\text{N}$  HSQC spectra of  $^{15}\text{N}$ - $\alpha\text{Ncat-ABD-H1}$  collected at different titration steps from 0.05 mM to 1.60 mM.
- c.** SEC-MALS profiles of  $\alpha\text{Ecat-ABD}$ . The elution profiles of  $\alpha\text{Ecat-ABD-WT}$  (left) and  $\alpha\text{Ecat-ABD-H1}$  (right) at different concentrations (3 mg/ml to 30 mg/ml) are plotted with the MALS analysis results showing the estimated molecular mass of  $\alpha\text{cat-ABD}$  monomers and dimers. Significance by ANOVA.  $N = 3$ . The dimer peak fractions (green line) collected from the 30 gm/mL SEC runs were analyzed by SDS-PAGE.
- d.** A scheme of TCS experiments performed with unlabeled F-actin and  $^{15}\text{N}/^2\text{H}$ -labeled  $\alpha\text{Ncat-ABD-WT}$ .

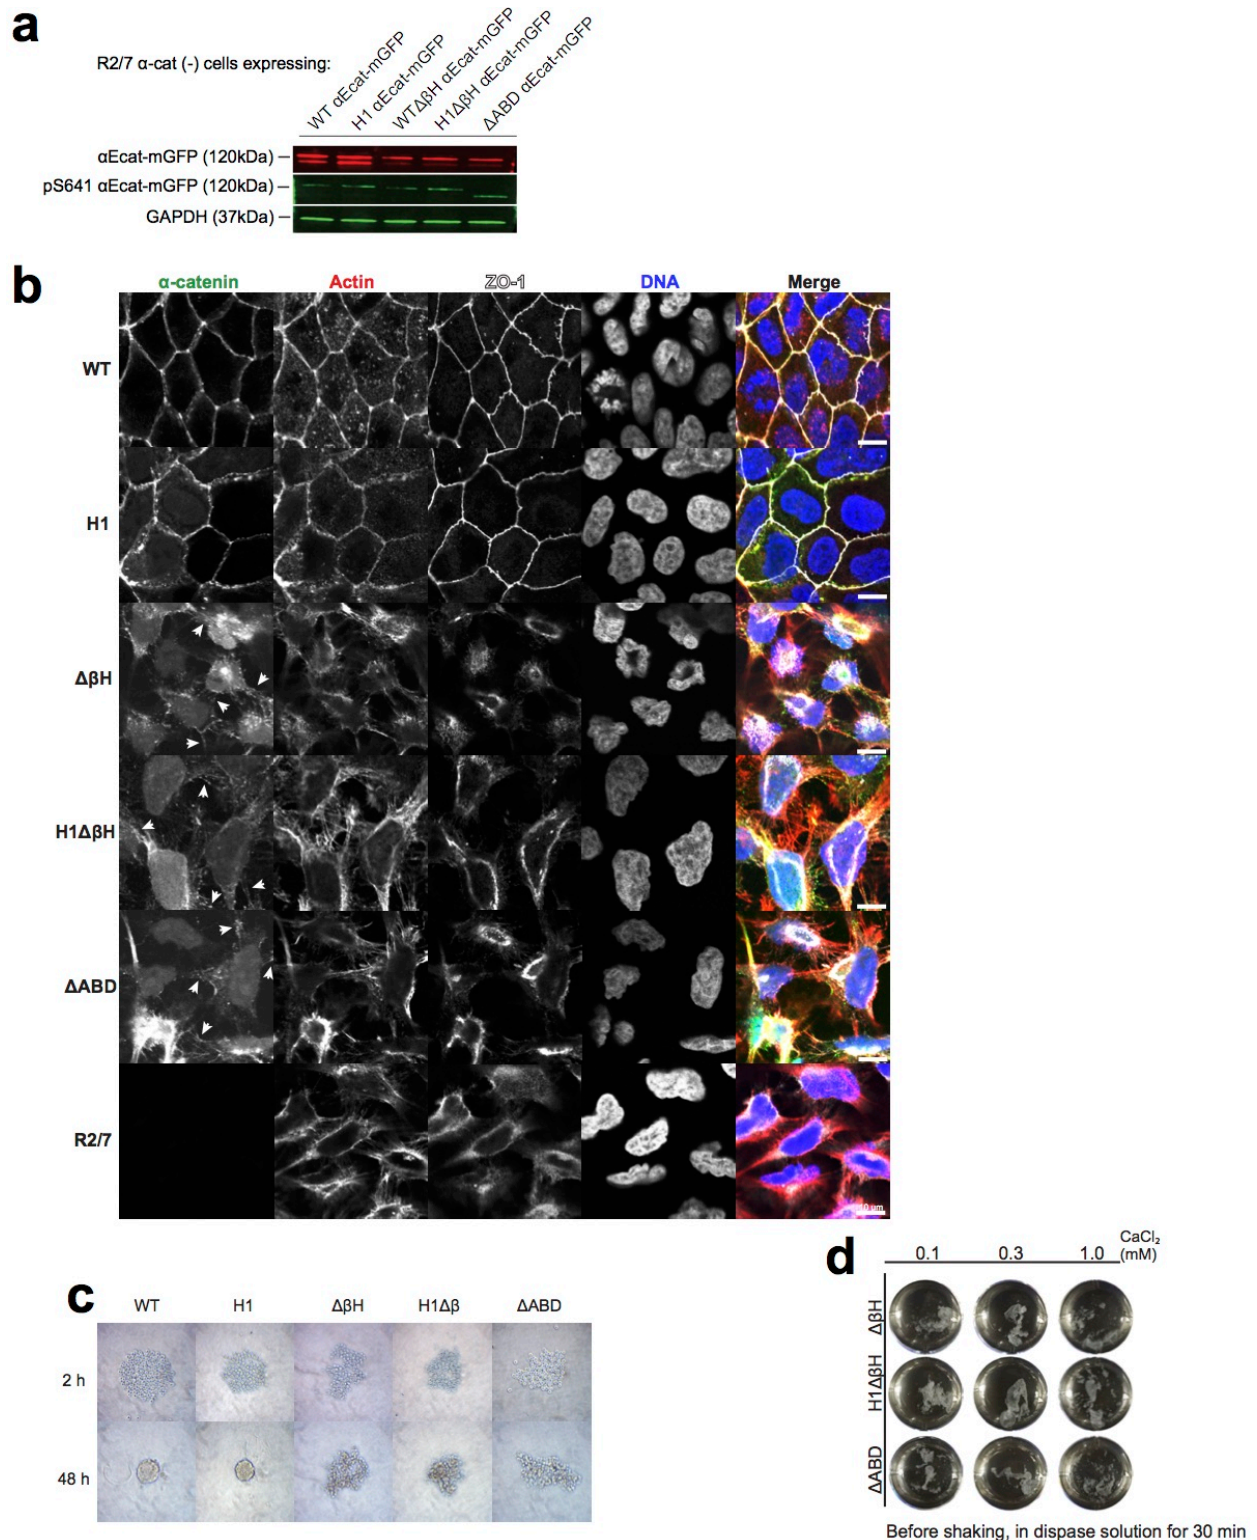

**Supplementary Figure 8:**  $\alpha$ cat-ABD is critical for the formation of multicellular structures.

**a.** Immunoblots of R2/7 cells expressing  $\alpha$ -catenin variants tagged with mGFP. pS641 antibody is specific for  $\alpha$ E-catenin containing phosphorylated Ser641.

**b.** Confocal images of R2/7 cells expressing  $\alpha$ -catenin variants tagged with mGFP. Actin filaments are stained with Phalloidin. ZO-1 is visualized by immunostaining. DNA is stained

with Hoechst 33342. Colocalization of  $\alpha$ -catenin and F-actin at AJs was readily observed in R2/7 cells expressing  $\alpha$ Ecat-WT or  $\alpha$ Ecat-H1, but not with cells expressing the  $\Delta\beta$ H, H1 $\Delta\beta$ H or  $\Delta$ ABD variant. Accumulation of  $\alpha$ -catenin in protrusions of cells expressing the  $\Delta\beta$ H, H1 $\Delta\beta$ H or  $\Delta$ ABD variant is indicated by arrows.

**c.** 3D cell culture of R2/7 cells expressing  $\alpha$ -catenin variants. Incubation of R2/7 cells (~200 cells) expressing  $\alpha$ Ecat-WT or  $\alpha$ Ecat-H1 resulted in the formation of single spheroid structure after 48 h. In comparison, R2/7 cells expressing  $\alpha$ Ecat- $\Delta\beta$ H,  $\alpha$ Ecat-H1 $\Delta\beta$ H or  $\alpha$ Ecat- $\Delta$ ABD mostly remained as aggregated mass of cells.

**d.** Dispase assay of R2/7 cells expressing  $\alpha$ -catenin variants. Cells expressing  $\alpha$ Ecat- $\Delta\beta$ H,  $\alpha$ Ecat-H1 $\Delta\beta$ H or  $\alpha$ Ecat- $\Delta$ ABD resulted in extensive fragmentation of cell monolayers in dispase solution prior to mechanical disruption.

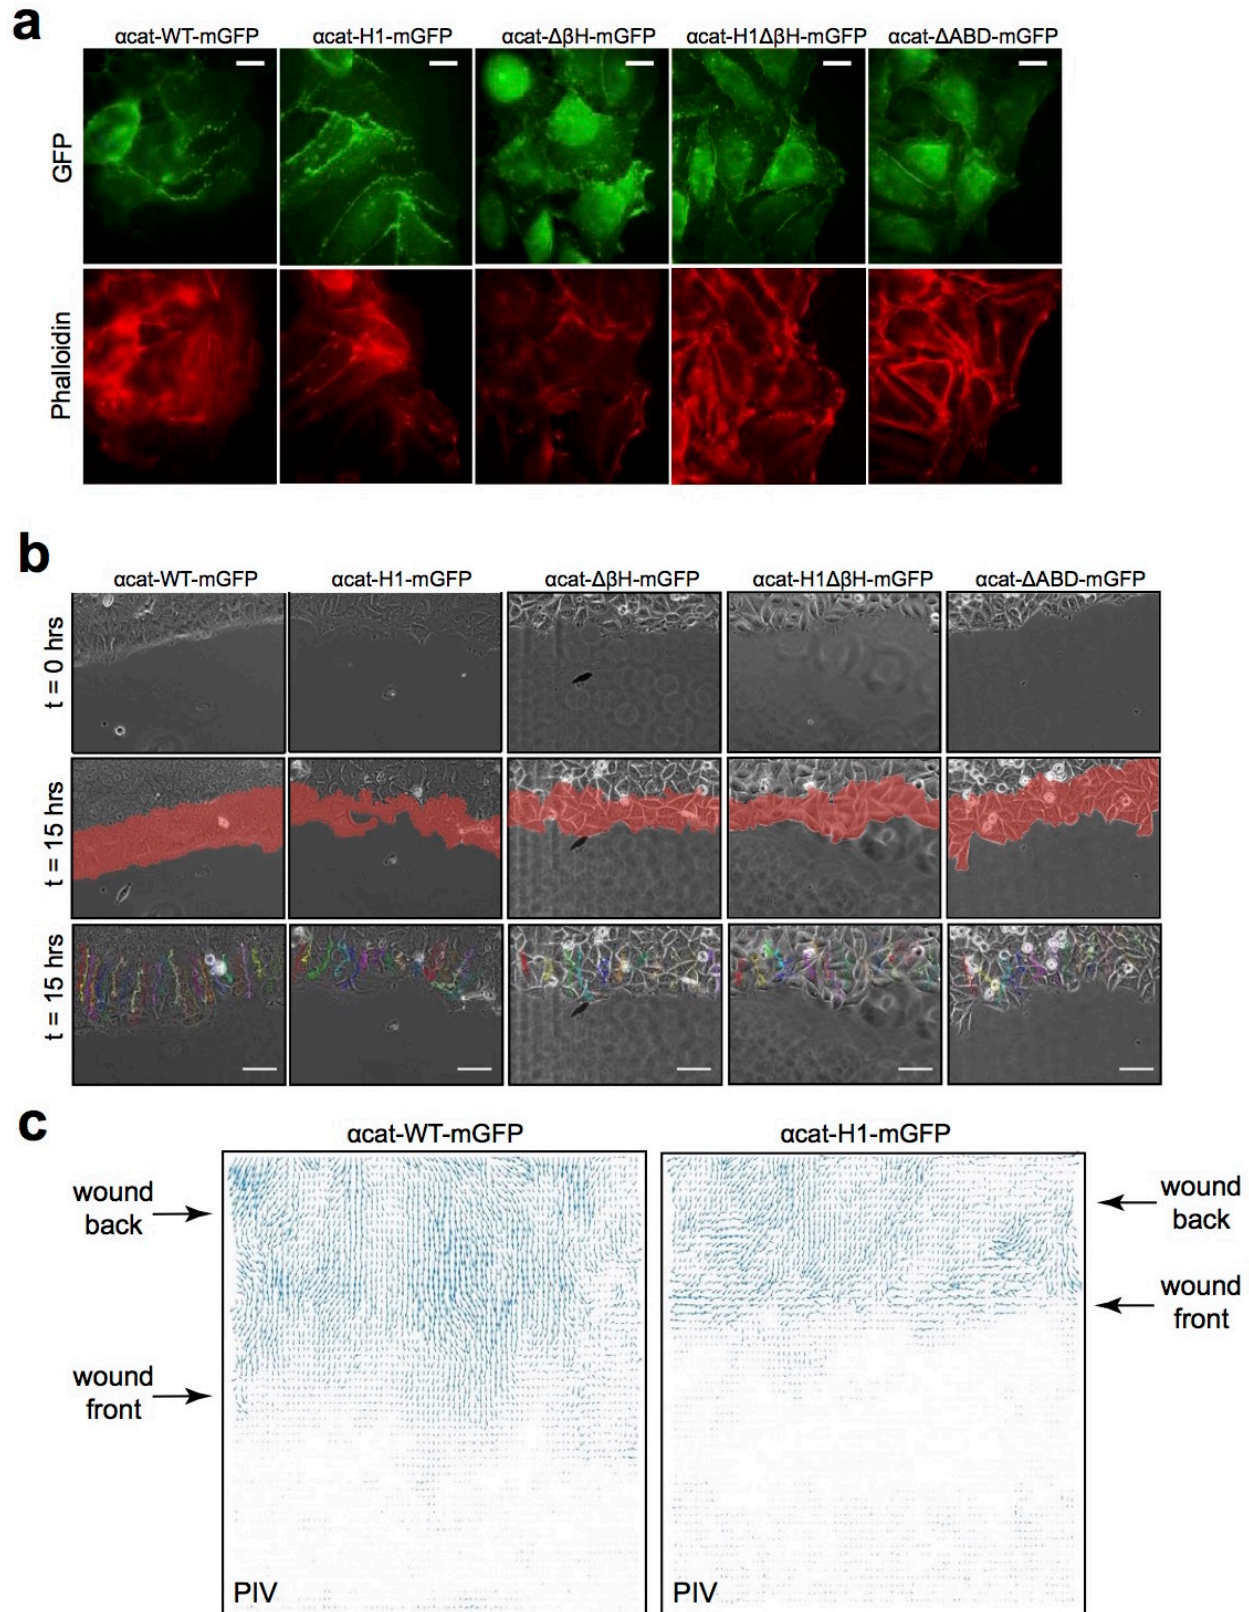

**Supplementary Figure 9:** Comparison of R2/7 cells expressing  $\alpha$ Ecat variants in wound healing.  
**a.** Confocal images of R2/7 cells expressing  $\alpha$ Ecat variants at the wound fronts.

**b.** Scratch wound healing assay with R2/7 cells expressing  $\alpha$ Ecat variants. Cells in monolayers lacking cell-cell adhesion move in a less coordinated fashion, whereas the  $\alpha$ Ecat-H1 wound front simply moves more slowly (see also Supplementary Movie 4).

**c.** Particle image velocimetry (PIV) analysis averaged from 3  $\alpha$ Ecat-WT (left) or 4  $\alpha$ Ecat-H1 (right) scratch wounds from two independent biological replicates. Note that as with the manual tracking method of wound-proximal cells in Fig. 3d and Supplementary Fig. 9b, this automated method shows that vector direction, as opposed to size (*i.e.*, cell speed)- particularly at the wound front- is most different between  $\alpha$ Ecat-WT versus  $\alpha$ Ecat-H1-expressing cells. For visualization, vector arrow scale is 2x, which corresponds to 1-2 microns per 10 minute interval.



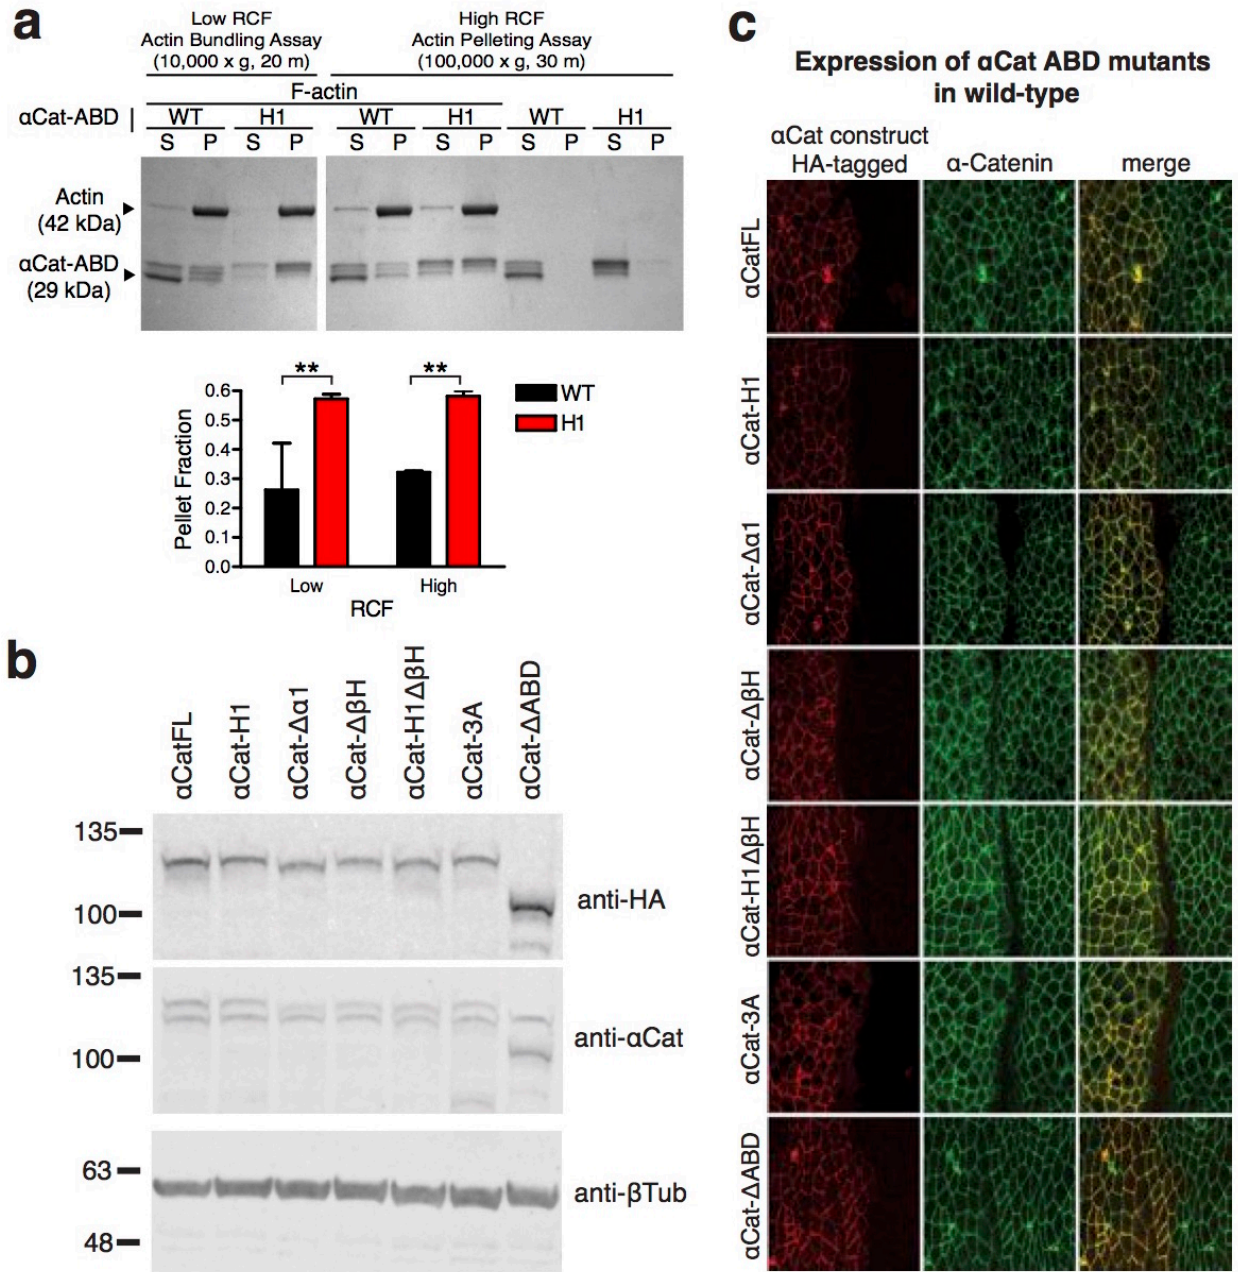

**Supplementary Figure 10: Characterization of *Drosophila* α-Cat ABD mutants.**

**a.** *In vitro* actin-binding (high RCF) and actin-bundling (low RCF) assay results of *Drosophila* αCat-ABD-WT and αCat-ABD-H1 proteins. Data are presented as mean ± SEM (N = 3). Significance by ANOVA; \*\*P < 0.01.

**b.** Immunoblot analysis of HA-tagged αCatFL and α-Cat ABD mutants expressed in *Drosophila* embryos with *da-Gal4*. Proteins are detected with antibodies directed against HA, αCat, and α-Tubulin as a loading control. Note that transgenic proteins show similar levels to endogenous α-Cat.

**c.** Expression of HA-tagged αCatFL and αCat ABD mutants in the epidermis of wild-type embryos at stage 15. Expression is driven in stripes by *paired-Gal4*. Embryos were stained for HA (red) and α-Cat (green). All αCat variants are enriched at AJs.

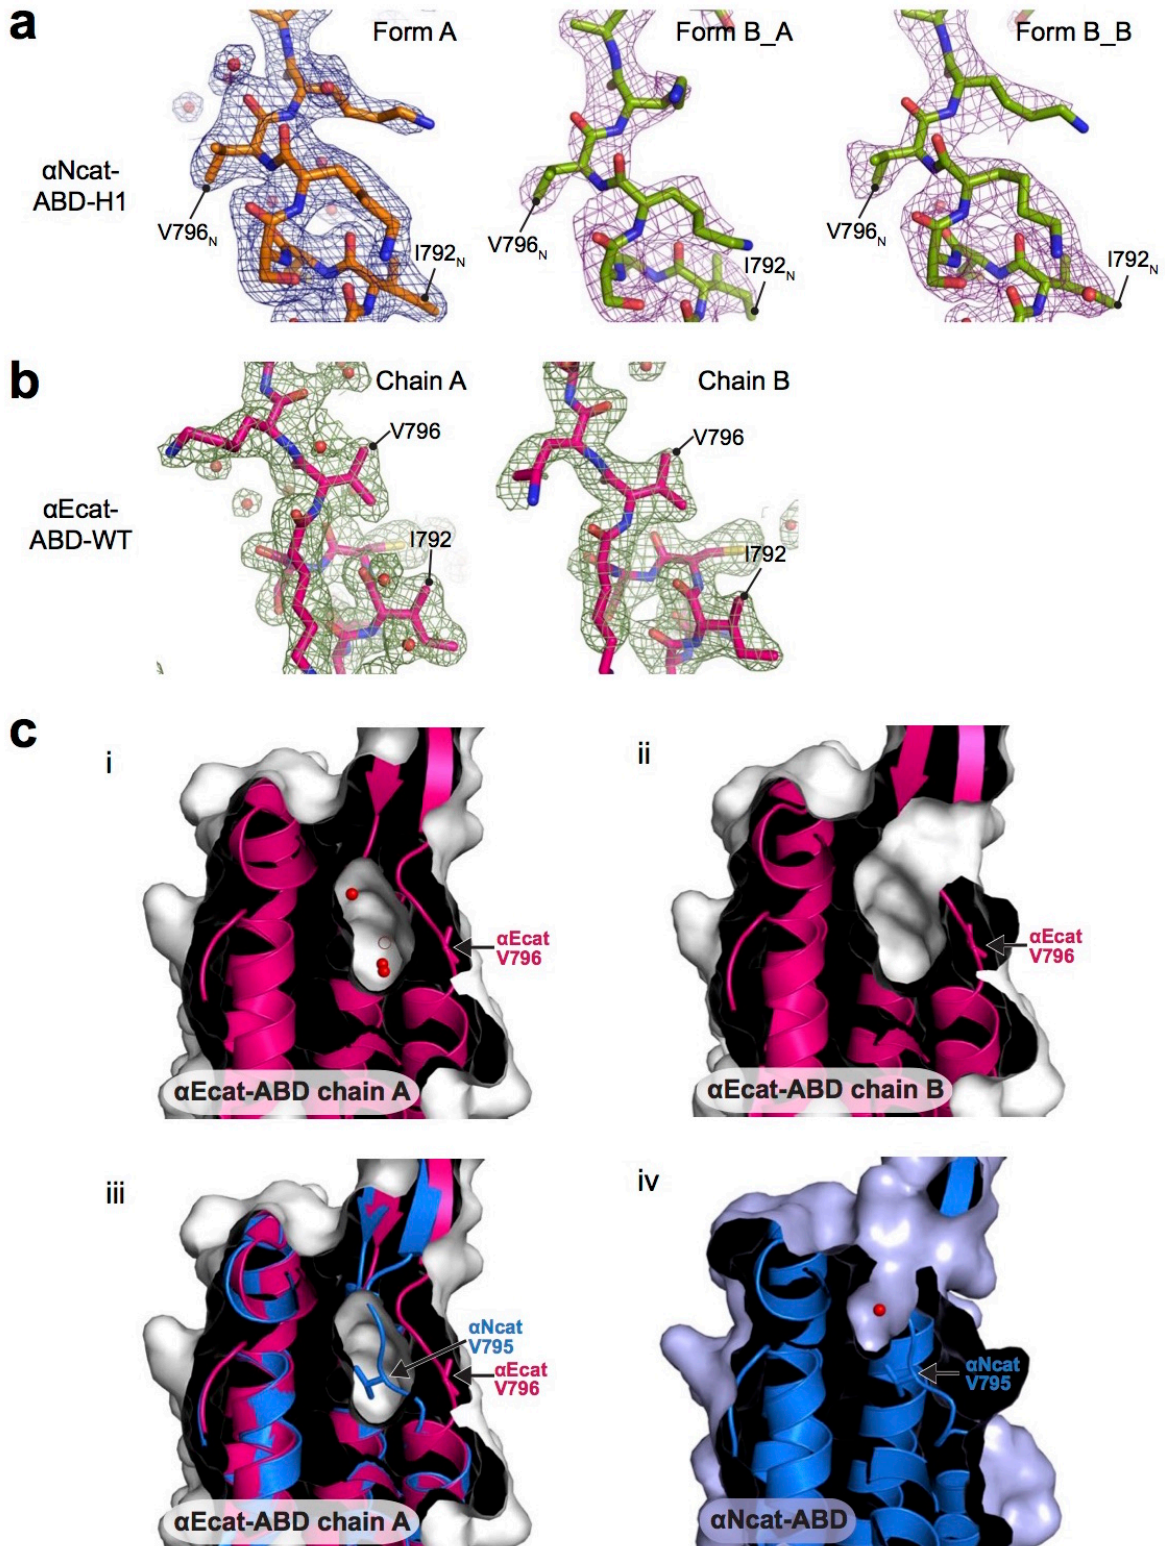

**Supplementary Figure 11: Cryptic and exposed states of the actin binding site residue V796.**  
**a.** Simulated annealing-omit maps (contoured at  $1\sigma$ ; mesh) around V796<sub>N</sub> of  $\alpha$ Ncat-ABD-H1 show the cryptic conformational state of this residue in all three crystallographically independent structures from forms A and B.

**b.** The initial electron density map obtained from bromide-SAD phasing around V796 of  $\alpha$ Ecat-ABD-WT (contoured at  $1\sigma$ ; mesh). It shows the exposed state of V796, which is not involved in crystal packing, in both chains of the asymmetric unit. The side chain of another hydrophobic residue, I792, is also exposed on the actin-binding surface of  $\alpha 5$ -helix.

**c.** Surface representation of  $\alpha$ Ecat-ABD-WT and  $\alpha$ Ncat-ABD-H1. Both  $\alpha$ Ecat-ABD-WT chains A and B contain a cavity near V796: the cavity in chain A (panel i and Fig. 5b) is closed off and contains four water molecules, whereas the cavity in chain B (panel ii) is connected to the outer surface and does not contain any solvents or symmetry-related molecules. A close resemblance between the surface representations of  $\alpha$ Ecat-ABD-WT (panel iii) and  $\alpha$ Ncat-ABD-WT (panel iv) suggests that the appearance of the cavity in  $\alpha$ Ecat-ABD-WT involves a localized conformational change of the  $\alpha 5$ - $\beta 1$  linkage containing V796.

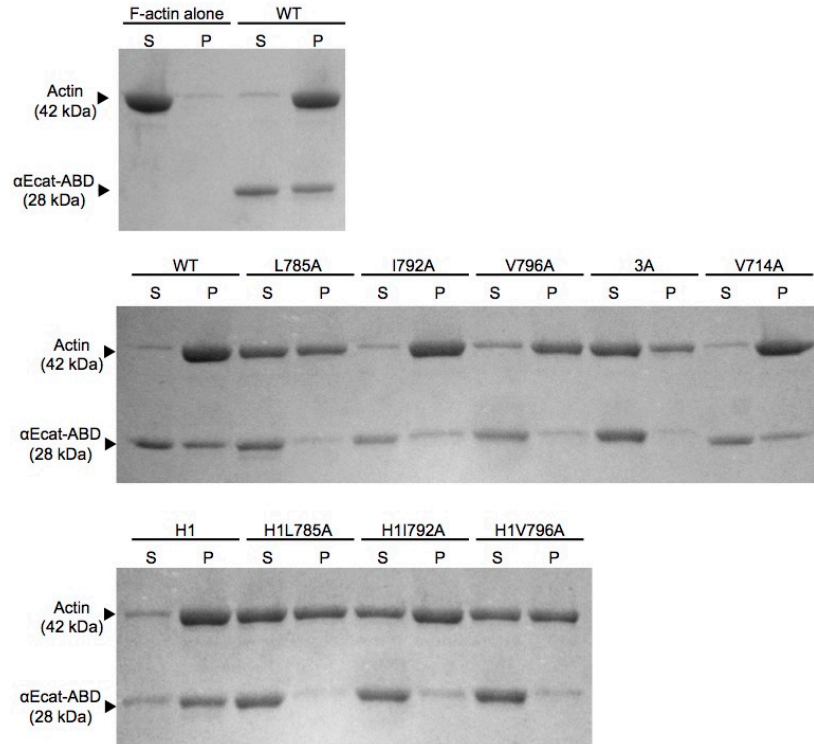

**Supplementary Figure 12:** *In vitro* actin bundling assays of αEcat-ABD variants.

Actin bundling was analyzed by sedimentation of the αEcat-ABD/F-actin mixture at low RCF (10,000 x g). While F-actin alone predominantly remains in the supernatant (S) fraction, the incubation of F-actin with αEcat-ABD-WT or other variants resulted in the F-actin-αEcat-ABD complex cosedimented in the pellet (P) fraction.

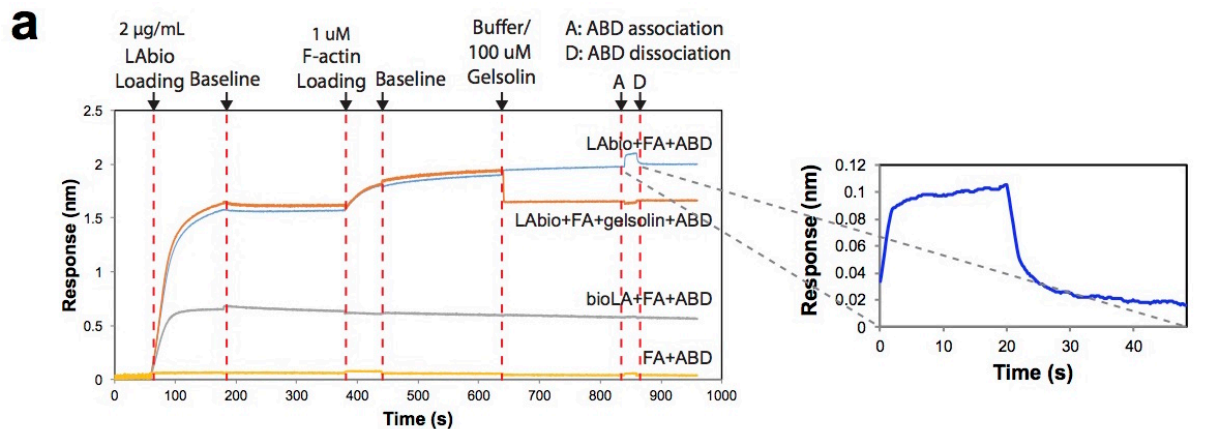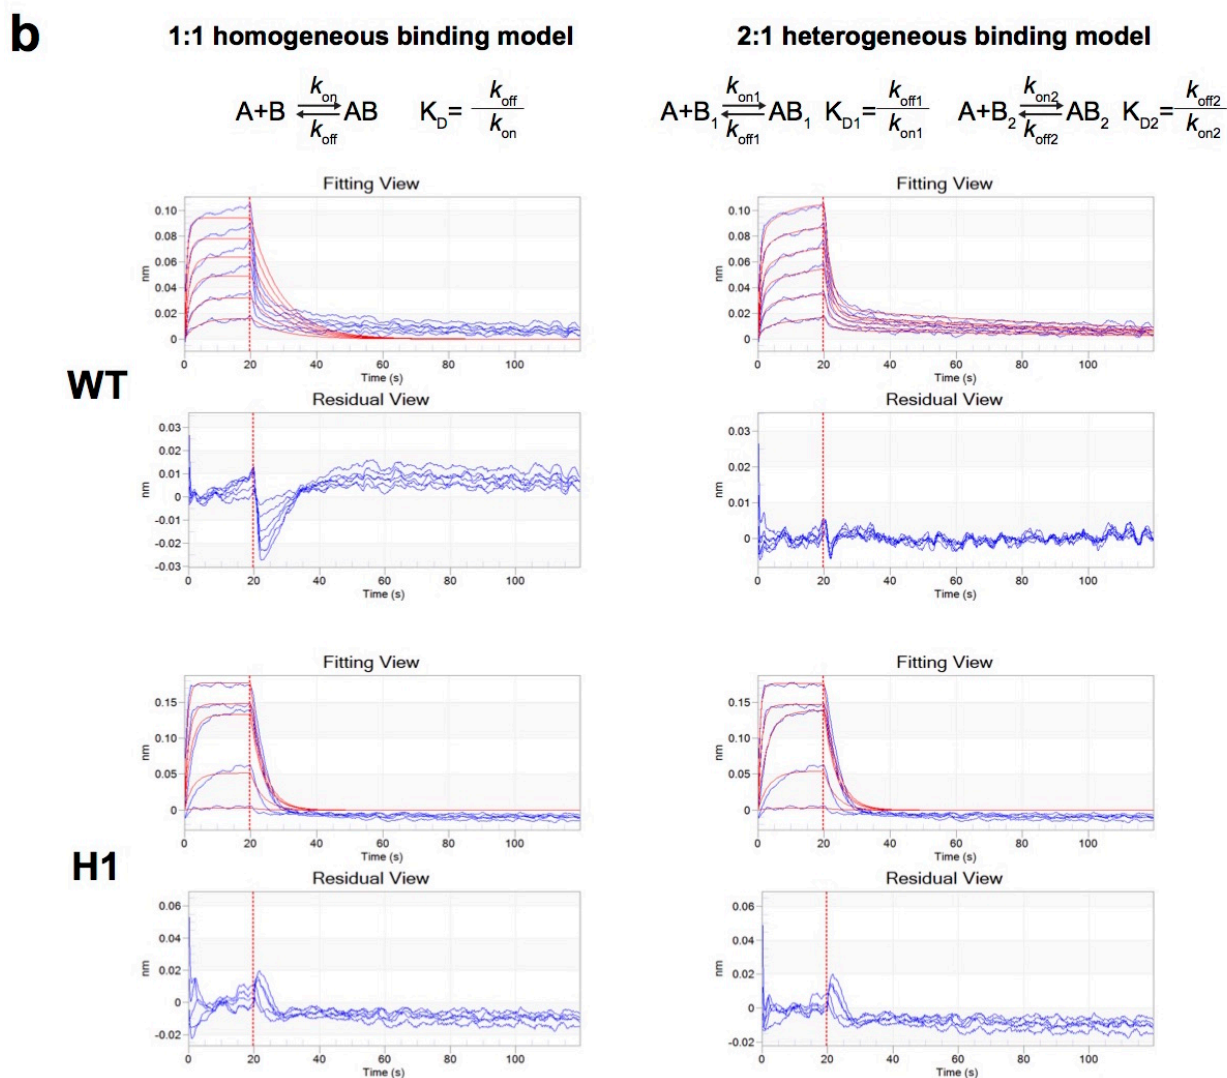

**Supplementary Figure 13:** Bio-layer interferometry (BLI) analyses of the  $\alpha$ Ecat-ABD-F-actin interaction.

**a.** Comparison of BLI response curves. Biosensors coated with LABio (the C-terminally biotinylated LifeAct; blue and red), bioLA (the N-terminally biotinylated LifeAct; gray) or

buffer (yellow) was used to immobilize F-actin (FA), and measure subsequent association (A) and dissociation (D) of  $\alpha$ Ecat-ABD. The binding of F-actin to LABio-coated sensors was confirmed by increased response curve upon stable association with F-actin. Incubation of a SA-sensor-LABio-FA with gelsolin S1 resulted in depolymerisation of bound F-actin and the response curve returning to the level before the addition of F-actin, and did not show any interaction with ABD.

**b.** Comparison of the fit of 1:1 homogeneous and 2:1 heterogeneous ligand (HL) binding models with the  $\alpha$ Ecat-ABD-WT and -H1 BLI data. Both the fitting and residual (a plot of the difference between the response and fitted curves) views of the WT data suggest that a 2:1 HL binding model is suited to fit the WT data than the 1:1 homogenous binding model (Residual view shows greater deviations between the response and fitted curves). In comparison, the shape of H1 response curves are noticeably different from the WT curves, and the H1 data fit well with the 1:1 binding model. The 2:1 HL binding model fits similarly well with the H1 data, but the calculated percentage of two kinetic interactions in the total binding revealed that the best fit was obtained when there was no contribution from the second set of kinetic interaction, hence confirming the good agreement between the H1 data and the 1:1 fitting model.

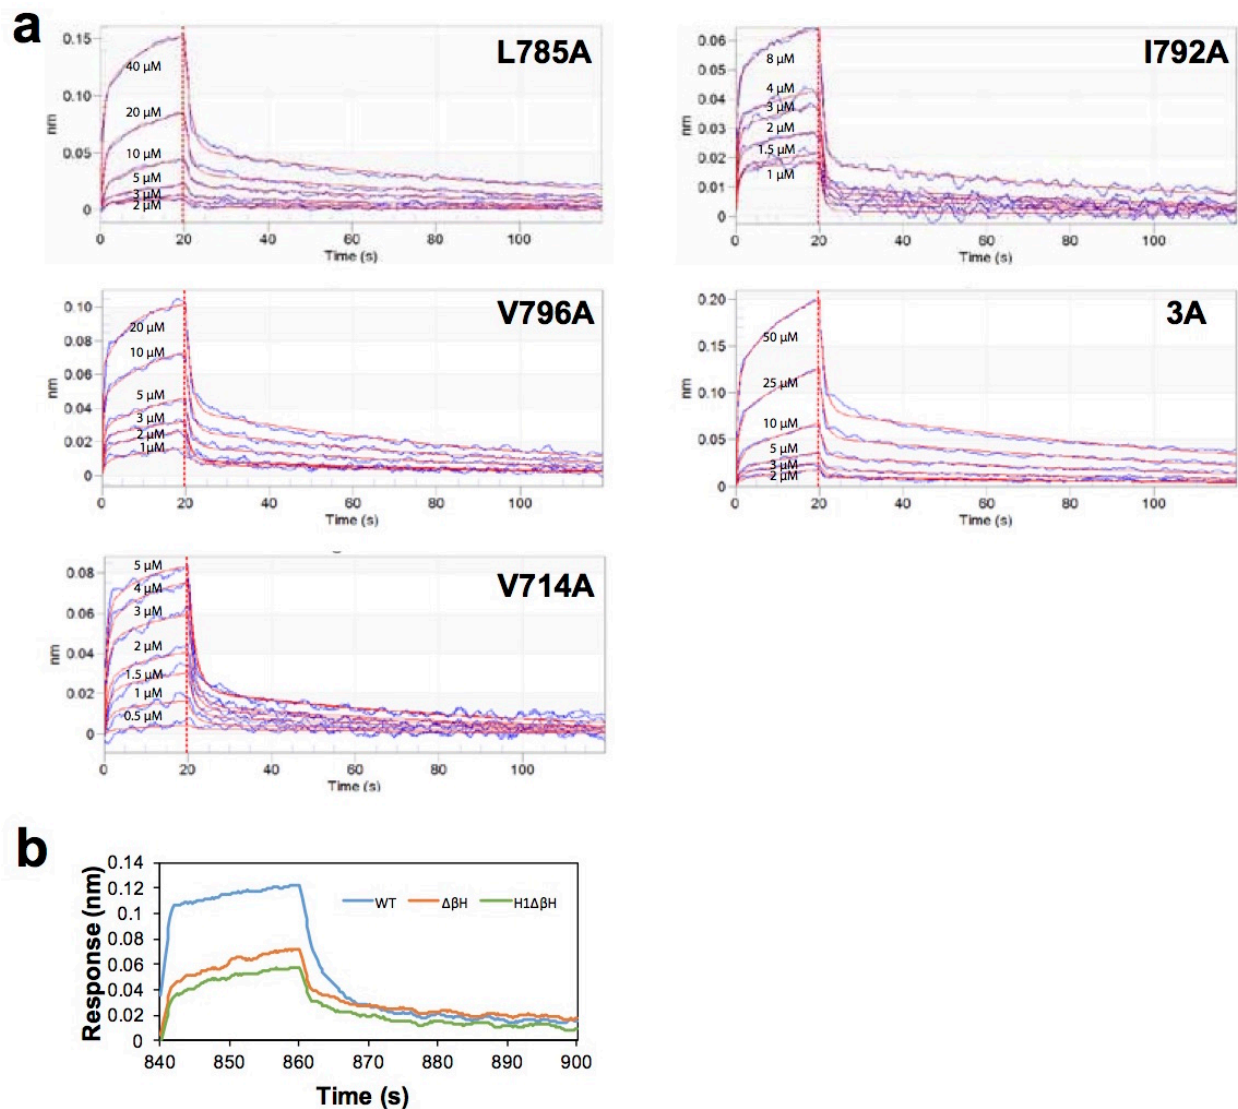

**Supplementary Figure 14:** BLI analyses of the interaction between F-actin and  $\alpha$ Ecat-ABD variants.

**a.** BLI responses curves of  $\alpha$ Ecat-ABD variants, L785A, I792A, V796A, 3A, and V714A. The  $K_D$  values were obtained by fitting concentration-dependent F-actin binding curves (blue) to a 2:1 heterogeneous binding model (red curves). Kinetic rate constants ( $k_{on}$  and  $k_{off}$ ) and the dissociation constant ( $K_D$ ) determined from curve fitting analyses are shown in Table 1.

**b.** BLI response curves of the  $\alpha$ Ecat-ABD variants containing the  $\Delta\beta H$  mutation. Comparison of response curves obtained with 4  $\mu$ M  $\alpha$ Ecat-ABD- $\Delta\beta H$  and -H1 $\Delta\beta H$  mutants confirmed that the  $\beta H$  deletion affected the F-actin binding affinity, as suggested by actin cosedimentation results (Fig. 2e).

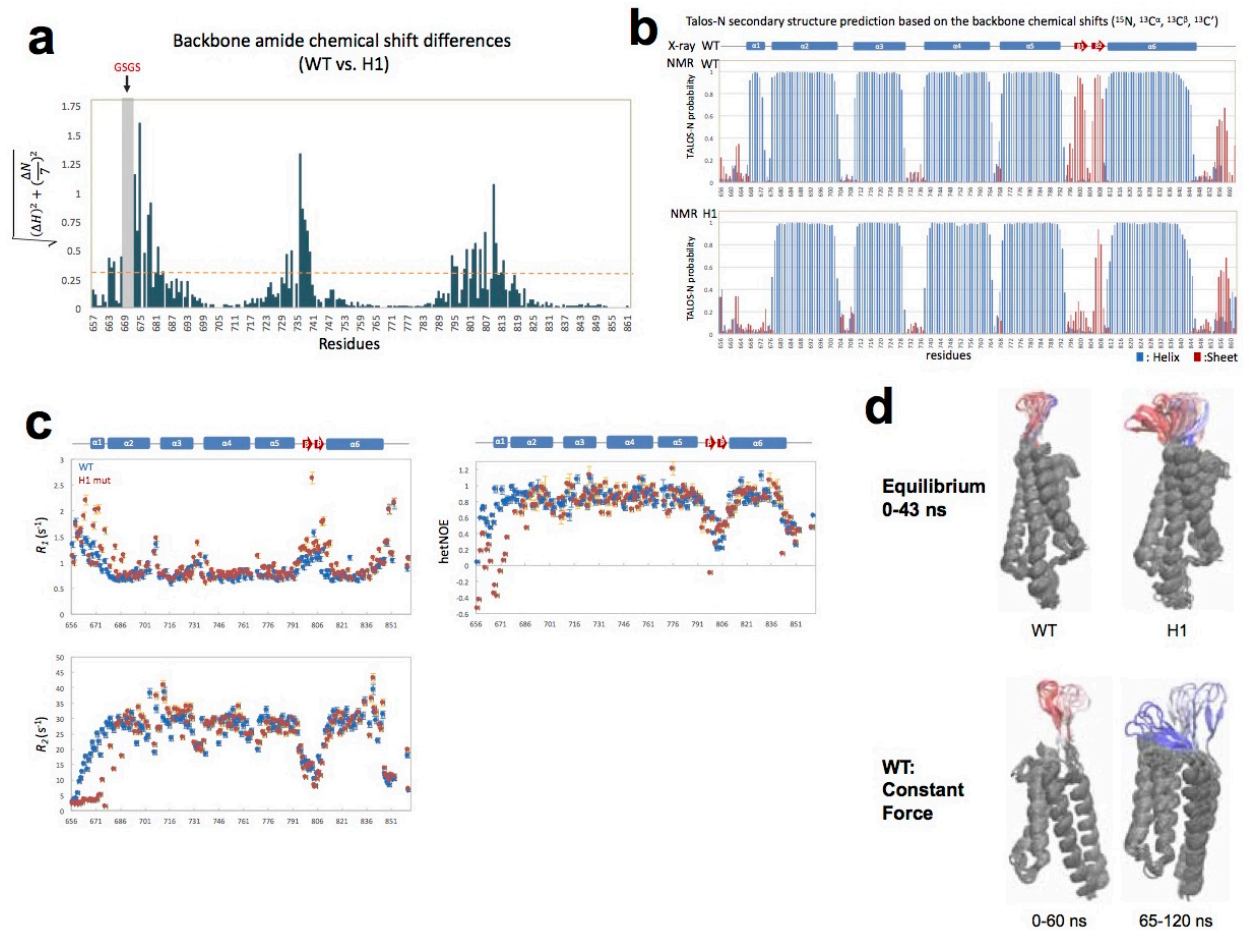

**Supplementary Figure 15: NMR studies of the  $\alpha$ Ncat-ABD-WT and -H1 variants.**

**a.** Plots of backbone amide chemical shift differences between  $\alpha$ Ncat-ABD-WT and  $\alpha$ Ncat-ABD-H1. The H1 mutation affected three regions:  $\alpha$ 1-helix, residues 732<sub>N</sub>-741<sub>N</sub> that interact with the side chain of R670<sub>N</sub> from  $\alpha$ 1-helix, and residues 795<sub>N</sub>-815<sub>N</sub> containing V796<sub>N</sub> and  $\beta$ H.

**b.** Chemical shift index-based secondary structure predictions of  $\alpha$ Ncat-ABD-WT and  $\alpha$ Ncat-ABD-H1. These predictions suggest that the region containing V796<sub>N</sub> in  $\alpha$ Ncat-ABD-H1 adopted an alternate conformation compared to  $\alpha$ Ncat-ABD-WT.

**c.** NMR relaxation studies of  $\alpha$ Ncat-ABD-WT and  $\alpha$ Ncat-ABD-H1. The  $\beta$ H motif displays fast tumbling motion in solution along with N- and C-termini.

**d.** Time-lapse images of the  $\alpha$ Ncat-ABD during MD simulations. Each  $\beta$ -hairpin ( $\beta$ H) domain is color-coded according to simulation timestep. As the simulation proceeds, the color changes from red to white to blue. The remaining ABD is colored gray. Residues N-terminal to  $\alpha$ 2-helix are omitted for clarity. (TOP)  $\alpha$ Ncat-ABD-WT and  $\alpha$ Ncat-ABD-H1 during equilibrium MD simulations. The time-lapse images show each frame (every 1 ns) during the 43-ns simulation of H1 or the first 43 ns of the simulation of  $\alpha$ Ncat-ABD-WT. (BOTTOM)  $\alpha$ Ncat-ABD-WT before (0-60 ns) or after (65-120 ns)  $\alpha$ 1-helix unfolds in a constant-force SMD simulation. The time-lapse images show every 5 frames (every 5 ns) of the SMD simulation of  $\alpha$ Ncat-ABD-WT.



**Supplementary Table 1:  $\alpha$ -catenin constructs**

| $\alpha$ -catenin                             | Constructs                           | Amino Acids Present | Missense Mutation     |
|-----------------------------------------------|--------------------------------------|---------------------|-----------------------|
| <b>Mouse <math>\alpha</math>E-catenin</b>     |                                      |                     |                       |
|                                               | $\alpha$ EcatFL                      | 1-906               | -                     |
|                                               | $\alpha$ Ecat-H1                     | 1-906               | RAIM670-673GSGS       |
|                                               | $\alpha$ Ecat- $\Delta\beta$ H       | 1-798/811-906       | -                     |
|                                               | $\alpha$ Ecat-H1 $\Delta\beta$ H     | 1-798/811-906       | RAIM670-673GSGS       |
|                                               | $\alpha$ Ecat- $\Delta$ ABD          | 1-651               | -                     |
|                                               | $\alpha$ Ecat-ABD-WT                 | 652-906             | -                     |
|                                               | $\alpha$ Ecat-ABD-H1                 | 652-906             | RAIM670-673GSGS       |
|                                               | $\alpha$ Ecat-ABD- $\Delta\alpha$ 1  | 671-906             | -                     |
|                                               | $\alpha$ Ecat-ABD- $\Delta\beta$ H   | 652-798/811-906     | -                     |
|                                               | $\alpha$ Ecat-ABD-H1 $\Delta\beta$ H | 652-798/811-906     | RAIM670-673GSGS       |
|                                               | $\alpha$ Ecat-ABD-V714A              | 652-906             | V714A                 |
|                                               | $\alpha$ Ecat-ABD-L785A              | 652-906             | L785A                 |
|                                               | $\alpha$ Ecat-ABD-I792A              | 652-906             | I792A                 |
|                                               | $\alpha$ Ecat-ABD-V796A              | 652-906             | V796A                 |
|                                               | $\alpha$ Ecat-ABD-3A                 | 652-906             | L785A/I792A/V796A     |
|                                               | $\alpha$ Ecat-ABD-H1L785A            | 652-906             | RAIM670-673GSGS+L785A |
|                                               | $\alpha$ Ecat-ABD-H1I792A            | 652-906             | RAIM670-673GSGS+I792A |
|                                               | $\alpha$ Ecat-ABD-H1V796A            | 652-906             | RAIM670-673GSGS+V796A |
|                                               | NM <sub>1</sub> ABD                  | 1-402/663-906       | -                     |
|                                               | NM <sub>1</sub> ABD*                 | 1-402/697-906       | -                     |
|                                               | NM <sub>1</sub>                      | 1-402               | -                     |
|                                               | ABD                                  | 663-906             |                       |
|                                               | ABD*                                 | 697-906             |                       |
| <b>Mouse <math>\alpha</math>N-catenin</b>     |                                      |                     |                       |
|                                               | $\alpha$ Ncat-ABD-WT                 | 651-905             | -                     |
|                                               | $\alpha$ Ncat-ABD-H1                 | 651-905             | RAIM669-672GSGS       |
|                                               | $\alpha$ Ncat-ABD- $\Delta\alpha$ 1  | 670-905             | -                     |
|                                               | $\alpha$ Ecat-ABD-L785A              | 651-905             | L784A                 |
|                                               | $\alpha$ Ecat-ABD-I792A              | 651-905             | I791A                 |
|                                               | $\alpha$ Ecat-ABD-V796A              | 651-905             | V795A                 |
|                                               | $\alpha$ Ecat-ABD-3A                 | 651-905             | L784A/I791A/V795A     |
| <b>Drosophila <math>\alpha</math>-catenin</b> |                                      |                     |                       |
|                                               | $\alpha$ CatFL                       | 1-917               | -                     |
|                                               | $\alpha$ Cat-H1                      | 1-917               | REAM683-686GSGS       |
|                                               | $\alpha$ Cat- $\Delta\alpha$ 1       | 1-658/691-917       | -                     |
|                                               | $\alpha$ Cat- $\Delta\beta$ H        | 1-811/824-917       | -                     |
|                                               | $\alpha$ Cat-H1 $\Delta\beta$ H      | 1-811/824-917       | REAM683-686GSGS       |
|                                               | $\alpha$ Cat-3A                      | 1-917               | L798A/I805A/V809A     |
|                                               | $\alpha$ Cat- $\Delta$ ABD           | 1-708               | -                     |

**Supplementary Table 2: Crystallographic data statistics**

|                                           | $\alpha$ Ncat-ABD-H1<br>Form A      | $\alpha$ Ncat-ABD-H1<br>Form B | $\alpha$ Ecat-ABD-WT<br>Native | $\alpha$ Ecat-ABD-WT<br>Br-SAD |
|-------------------------------------------|-------------------------------------|--------------------------------|--------------------------------|--------------------------------|
| <b>Data Collection</b>                    |                                     |                                |                                |                                |
| Space group                               | $P 6_522$                           | $P 2_12_12_1$                  | $P 2_12_12_1$                  | $P 2_12_12_1$                  |
| Cell dimensions<br>$a, b, c$ (Å)          | 108.7, 108.7,<br>133.1              | 75.1, 82.8, 105.3              | 56.3, 80.6, 104.5              | 56.3, 80.6, 104.5              |
| $\alpha, \beta, \gamma$ (°)               | 90, 90, 120                         | 90, 90, 90                     | 90, 90, 90                     | 90, 90, 90                     |
| Wavelength (Å)                            | 1.0                                 | 1.0                            | 1.0                            | 0.9198                         |
| Resolution range<br>(Å)                   | 42-2.2 (2.28-<br>2.20) <sup>a</sup> | 43-2.8 (2.91-2.8)              | 46-2.2 (2.28-<br>2.20)         | 50-2.3 (2.34-<br>2.30)         |
| R <sub>merge</sub> (I) (%)                | 7.6 (68.0)                          | 7.2 (68.7)                     | 5.9 (52.2)                     | 6.9 (47.8)                     |
| I/ $\sigma$ (I)                           | 31.7 (3.6)                          | 21.7 (2.8)                     | 31.7 (3.8)                     | 29.0 (3.9)                     |
| CC <sub>1/2</sub>                         | 0.98 (0.89)                         | 0.97 (0.88)                    | 0.99 (0.93)                    | 0.98 (0.93)                    |
| Number of<br>reflections                  | 24191                               | 16455                          | 24938                          | 21694                          |
| Completeness (%)                          | 99.8 (100.0)                        | 99.9 (100.0)                   | 100.0 (100.0)                  | 100.0 (100.0)                  |
| Redundancy                                | 13.1 (13.3)                         | 7.3 (7.4)                      | 7.4 (7.4)                      | 7.3 (7.4)                      |
| FOM                                       |                                     |                                |                                | 0.21                           |
| No. of Br sites                           |                                     |                                |                                | 8                              |
| <b>Refinement</b>                         |                                     |                                |                                |                                |
| R <sub>cryst</sub> /R <sub>free</sub> (%) | 20.2/22.6                           | 19.9/25.5                      | 20.6/25.2                      |                                |
| No. atoms                                 |                                     |                                |                                |                                |
| Protein                                   | 1472                                | 2897                           | 2955                           |                                |
| Ion                                       | -                                   | -                              | 15                             |                                |
| Water                                     | 89                                  | 19                             | 97                             |                                |
| B-factors (Å <sup>2</sup> )               |                                     |                                |                                |                                |
| Protein                                   | 54.4                                | 43.8                           | 51.3                           |                                |
| Ion                                       | -                                   | -                              | 73.3                           |                                |
| Water                                     | 57.9                                | 35.9                           | 49.5                           |                                |
| Ramachandran<br>statistics                |                                     |                                |                                |                                |
| Most favorable<br>regions (%)             | 99.5                                | 95.8                           | 98.2                           |                                |
| Allowed regions<br>(%)                    | 0.0                                 | 3.4                            | 1.9                            |                                |
| Disallowed<br>regions (%)                 | 0.5                                 | 0.8                            | 0.0                            |                                |
| R.m.s deviations                          |                                     |                                |                                |                                |
| Bond lengths (Å)                          | 0.008                               | 0.009                          | 0.008                          |                                |
| Bond angles (°)                           | 0.79                                | 0.92                           | 0.84                           |                                |

<sup>a</sup> Values in parentheses are for the highest resolution shell.
