# Supplementary material for: Force-dependent allostery of the α-catenin actin-binding domain controls adherens junction dynamics and functions
Source: PubMed Central journal article supplement (PMC6269467; doi:10.1038/s41467-018-07481-7), 2018-11-30
Supplement: 41467_2018_7481_MOESM3_ESM.pdf [file 41467_2018_7481_MOESM3_ESM.pdf]

## Description of Additional Supplementary Files

File Name: Supplementary Movie 1

Description: A movie of constant-force SMD simulations of  $\alpha$ Ncat-ABD-WT. Cartoon representation shows that the  $\alpha$ 1-helix (blue) starts to unfold at  $\sim$ 60 ns

File Name: Supplementary Movie 2

Description: A close-up view of constant-force SMD simulations of  $\alpha$ Ncat-ABD-WT. V796<sub>N</sub> flips out from the interior pocket (red and blue surface) shortly before the  $\alpha$ 1-helix (blue surface and ribbon) unfolds and pulls away from the pocket at  $\sim$ 60 ns.

File Name: Supplementary Movie 3

Description: Wide-field fluorescence spinning-disk live-cell microscopy of  $\alpha$ EcatFL-mGFP (WT) or  $\alpha$ Ecat-H1-mGFP (H1) expressing R2/7 cells. Cells stably expressing  $\alpha$ cat-mGFP lines were infected with LifeAct Ruby, resulting in some cells not displaying the Ruby signal. Cells were plated on glass-bottomed dish coverslips  $\sim$ 48hr before imaging, and scratch-wounds were generated 18 hours before imaging. Time-lapse sequences were acquired at 30 s intervals for both GFP and Life-Act-Ruby channels. Cell line, time-stamp and scale bars (21  $\mu$ m) are burned-into the movie sequence. A six-panel composite of grayscale inverted and color overlay movies are shown.

File Name: Supplementary Movie 4

Description: Phase contrast live imaging of scratch wounded R2/7 cell monolayers. A four-panel composite of image sequences is shown for  $\alpha$ EcatFL (WT),  $\alpha$ Ecat-H1 (H1),  $\alpha$ EcatFL- $\Delta\beta$ H (WT $\Delta\beta$ ) and  $\alpha$ Ecat-H1 $\Delta\beta$ H (H1 $\Delta\beta$ )-expressing cells. Time-lapse sequences were acquired at 10-min intervals for 15 hours.
